# Supplementary material for: Transforming Growth Factor-β1 and Incident Type 2 Diabetes
Source: Oxford University Press journal article supplement (doi:10.2337/dc09-0476), 2009-07-10

**Online-Only Appendix**

Christian Herder PHD, MSC1, Astrid Zierer PHD2, Wolfgang Koenig MD3,

Michael Roden MD1,4, Christa Meisinger MD, MPH2, Barbara Thorand PHD, MPH2

TGF-1 and incident type 2 diabetes
Results from the MONICA/KORA case-cohort study, 1984-2002

**RESEARCH DESIGN AND METHODS**

**Study population.** The design of this prospective case-cohort study within the population-based MONICA (MONItoring of trends and determinants in CArdiovascular disease)/KORA (Cooperative Health Research in the Region of Augsburg) cohort has been described before (1-3). Briefly, three independent cross-sectional population-based surveys were performed within the MONICA Augsburg project in 1984/85 (S1), 1989/90 (S2) and 1994/95 (S3) in Augsburg and two adjacent counties (Germany). The total number of participants was 13,427 (6,725 men, 6,702 women) aged 25-64 (S1) or 25-74 years (S2, S3). All subjects were prospectively followed within the KORA research frame. The study was approved by the local authorities and performed according to the Declaration of Helsinki. All participants provided written informed consent.

The incidence of type 2 diabetes between participants’ study start dates and December 31st, 2002 was assessed using a written follow-up questionnaire sent to all participants of the three baseline surveys in 1997/1998 and 2002/2003. Furthermore, all S1 participants were invited to a follow-up examination in 1987/1988. Cases with self-reported incident diabetes were validated by a questionnaire mailed to the treating physician or medical chart review (1). Only subjects for whom the treating physician clearly reported a diagnosis of type 2 diabetes or for whom a diagnosis of type 2 diabetes was mentioned in the medical records or who were taking antidiabetic medication were classified as cases for the present analysis. Details on selection and exclusion of participants for the present study are shown in Supplementary Figure 1. This study was based on 1,934 participants (255 men, 205 women with incident type 2 diabetes; 724 men, 750 women without incident type 2 diabetes). Mean follow-up time (SD) was 10.94.7 years.

**Data acquisition.** Information on sociodemographic and lifestyle variables as well as on parental history of diabetes was collected through standardized interviews. In addition, standardized medical examinations including collection of a non-fasting venous blood sample for the determination of all biomarkers were performed. All procedures, laboratory methods and immunological assays have been described in detail (1-5). Serum samples were stored at -80°C.

Serum levels of TGF-1 were determined using the Quantikine Human TGF-1 Immunoassay (ELISA) from R&D Systems (Wiesbaden, Germany). Samples were acidified to activate latent TGF-1 to immunoreactive TGF-1 and neutralized prior to the ELISA as recommended by the manufacturer. Mean intra-/inter-assay coefficients of variation were 3.0% and 8.8%, respectively. There were no differences of serum TGF-1 levels in subgroups of the subcohort stratified by time since last food intake (<2 hrs, 2-3.9 hrs, 4-5.9 hrs, 6 hrs; *P* = 0.46) or stratified by time of blood sampling (before 11:00, 11:00-13:59, 14:00-16:59, 17:00 and later; *P* = 0.86) which indicates that serum levels of TGF-1 are mainly independent of food intake or circadian rhythm.

**Statistical analysis.** Means or proportions for baseline characteristics were computed using the SAS procedure SURVEYMEANS which estimated standard errors appropriate to the sampling scheme. For categorical variables cases and non-cases were compared using Wald chi-square test (SURVEYFREQ). Corresponding tests for continuous variables were performed as t-tests on regression coefficients (SURVEYREG). In case of non-normality, tests were carried out with log-transformed variables, and results were presented as geometric means with antilogs of standard errors of the adjusted log-means. Weighted Pearson correlation coefficients based on the random subcohort were calculated to investigate univariate associations. Skewed data were log-transformed. Cox proportional hazard models were used to assess the association of TGF-1 with incident type 2 diabetes. Because of the case-cohort design correction of the variance estimation was performed based on the sampling weights to give standard error estimates for the parameter estimates (6). The inverse of the sample sizes for the subcohort by the cohort of interest yielded survey and sex-specific sampling weights. If required we additionally differentiated between cases and non-cases. Correction for standard errors was made using the method by Barlow. Sex-specific tertiles of the weighted distributions in the subcohort were used. Tests for trend were conducted assigning the median value within each tertile to the corresponding tertile and including this variable in the Cox regression model. Interactions between TGF-1 tertiles (coded as dummy variables) and sex were examined using a likelihood ratio test to compare the model which contained only the main effects and the model additionally incorporated the interaction terms.For all analyses *P*<0.05 was considered to be statistically significant. All evaluations were performed with the statistical software package SAS (Version 9.1, SAS Institute Inc., Cary, NC, USA).

**REFERENCES**

1. Thorand B, Kolb H, Baumert J Koenig W, Chambless L, Meisinger C, Illig T, Martin S, Herder C: Elevated levels of interleukin-18 predict the development of type 2 diabetes: results from the MONICA/KORA Augsburg Study 1984-2002. *Diabetes* 54:2932-2938, 2005

2. Herder C, Baumert J, Thorand B Thorand B, Koenig W, de Jager W, Meisinger C, Illig T, Martin S, Kolb H: Chemokines as risk factors for type 2 diabetes: results from the MONICA/KORA Augsburg Study, 1984-2002. *Diabetologia* 49:921-929, 2006

3. Herder C, Klopp N, Baumert J, Müller M, Khuseyinova N, Meisinger C, Martin S, Illig T, Koenig W, Thorand B: Effect of macrophage migration inhibitory factor (MIF) gene variants and MIF serum concentrations on the risk of type 2 diabetes: results from the MONICA/KORA Augsburg Case-Cohort Study, 1984-2002. *Diabetologia* 51:276-284, 2008

4. Schaeffler V, Döring A, Winkler G, Keil U: Trends in food consumption in a south German population from 1984/85 to 1989/90: results from the WHO MONICA project Augsburg. *Ann Nutr Metab* 40:129-136, 1996

5. Hense HW, Filipiak B, Döring A, Stieber J, Liese A, Keil U: Ten-year trends of cardiovascular risk factors in the MONICA Augsburg Region in Southern Germany. Results from the 1984/85, 1989/90 and 1994/1995 surveys. *CVD Prevention* 1:318-327, 1998

6. Barlow WE: Robust variance estimation for the case-cohort design. *Biometrics* 50:1064-1072, 1994

**TABLE A1 --** Baseline characteristics of the MONICA/KORA case-cohort study participants without and with incident type 2 diabetes during follow-up

| **Variable** | **Type 2 diabetes cases** | **Type 2 diabetes non-cases** | ***P**** |
| --- | --- | --- | --- |
| Demographic |  |  |  |
| Number (men/women) | 255/205 | 724/750 | 0.019 |
| Age (years) | 56.1 (0.5) | 51.7 (0.3) | <0.001 |
| Education <12 years (%) | 82.9 | 74.8 | <0.001 |
| Clinical |  |  |  |
| Body mass index (kg/m2) | 30.2 (0.2) | 26.7 (0.1) | <0.001 |
| Waist-to-hip ratio † | 0.923 (0.005) | 0.865 (0.003) | <0.001 |
| Systolic blood pressure (mm Hg) | 142.2 (0.9) | 132.6 (0.5) | <0.001 |
| Diastolic blood pressure (mm Hg) | 85.1 (0.6) | 81.4 (0.3) | <0.001 |
| History of actual hypertension (%) | 67.9 | 39.2 | <0.001 |
| History of myocardial infarction (%) | 5.4 | 1.9 | 0.003 |
| Total cholesterol (mg/dl) | 246.4 (2.2) | 235.9 (1.1) | <0.001 |
| LDL cholesterol (mg/dl) † | 158.2 (2.3) | 145.9 (1.3) |  |
| HDL cholesterol (mg/dl) | 48.0 (0.7) | 57.6 (0.5) | <0.001 |
| Ratio TC/HDL-C | 5.59 (0.10) | 4.46 (0.04) | <0.001 |
| Parental history of diabetes (%) |  |  | <0.001 |
| Positive | 27.9 | 20.0 |  |
| Negative | 46.3 | 59.8 |  |
| Unknown | 25.8 | 20.2 |  |
| CRP (mg/l) ‡ | 2.41 (1.05) | 1.36 (1.03) | <0.001 |
| IL-6 (pg/ml) ‡ | 3.00 (1.04) | 1.97 (1.03) | <0.001 |
| Lifestyle |  |  |  |
| Smoking status (%) |  |  | 0.033 |
| Current smoker | 24.7 | 23.7 |  |
| Former smoker | 34.1 | 28.4 |  |
| Never smoker | 41.2 | 47.9 |  |
| Frequency of exercise (%) |  |  | <0.001 |
| Active/inactive | 29.7/70.3 | 41.5/58.5 |  |
| Alcohol consumption (%) § |  |  | 0.095 |
| 0 g/d | 33.9 | 29.2 |  |
| >0-39.9/19.9 g/d | 38.8 | 44.1 |  |
|  40/20 g/d | 27.4 | 26.7 |  |
| Current hormone replacement therapy (%) ║ | 8.6 | 11.7 | 0.26 |
| Current use of oral contraceptives (%) ¶ | 8.7 | 15.8 | 0.13 |
| Survey (%) |  |  | <0.001 |
| S1 | 38.7 | 30.9 |  |
| S2 | 39.3 | 36.4 |  |
| S3 | 22.0 | 32.8 |  |

Data are weighted percentages for categorical variables, weighted means (standard errors) for normally distributed continuous variables and ‡weighted geometric means with (antilog of standard errors of log means) for skewed continuous variables.

* t-test for continuous variables and chi-square-test for categorical variables

† Only measured in participants of survey 2 and 3

§ Men: 0, >0-39.9 g/d,  40 g/d; women: 0, >0-19.9 g/d,  20 g/d

║ Only for women aged ≥ 50 years with no current use of oral contraceptives

¶ Only for women aged < 50 years with no current hormone replacement therapy

# TABLE A2 -- Correlation between serum levels of TGF-1 and age, anthropometric and metabolic variables in the randomly drawn subcohort

| **Variable** | ***r*** | ***P*** | ***n*** |
| --- | --- | --- | --- |
| Age | -0.18 | <0.0001 | 1572 |
| Body mass index | 0.01 | 0.75 | 1572 |
| Waist-to-hip ratio | 0.07 | 0.027 | 1012 |
| Systolic blood pressure | -0.03 | 0.21 | 1572 |
| Diastolic blood pressure | 0.07 | 0.0051 | 1572 |
| Total cholesterol | 0.08 | 0.0021 | 1572 |
| LDL cholesterol | 0.05 | 0.11 | 1015 |
| HDL cholesterol | -0.01 | 0.83 | 1572 |
| Ratio TC/HDL-C | 0.07 | 0.0054 | 1572 |

The table gives Pearson correlation coefficients *r* and the respective *P* values.

# TABLE A3 -- Correlation between serum levels of TGF-1 and other immune mediators in the randomly drawn subcohort

| **Immune mediator** | ***r*** | ***P*** | ***n*** |
| --- | --- | --- | --- |
| CRP* | 0.04 | 0.10 | 1572 |
| IL-6* | 0.04 | 0.13 | 1572 |
| IL-18* | -0.003 | 0.92 | 1567 |
| MIF* | 0.06 | 0.012 | 1510 |
| MCP-1* | 0.02 | 0.49 | 1567 |
| IL-8* | 0.11 | <0.001 | 1565 |
| IP-10* | -0.03 | 0.22 | 1566 |
| RANTES* | 0.46 | <0.001 | 1512 |
| sICAM-1 | -0.004 | 0.87 | 1572 |
| sE-selectin | 0.04 | 0.080 | 1572 |

The table gives Pearson correlation coefficients *r* and the respective *P* values. Concentrations of immune mediators that are marked with an asterisk were log-transformed.

# Supplementary Figure 1 -- Selection of case-cohort study participants (T2D: type 2 diabetes)


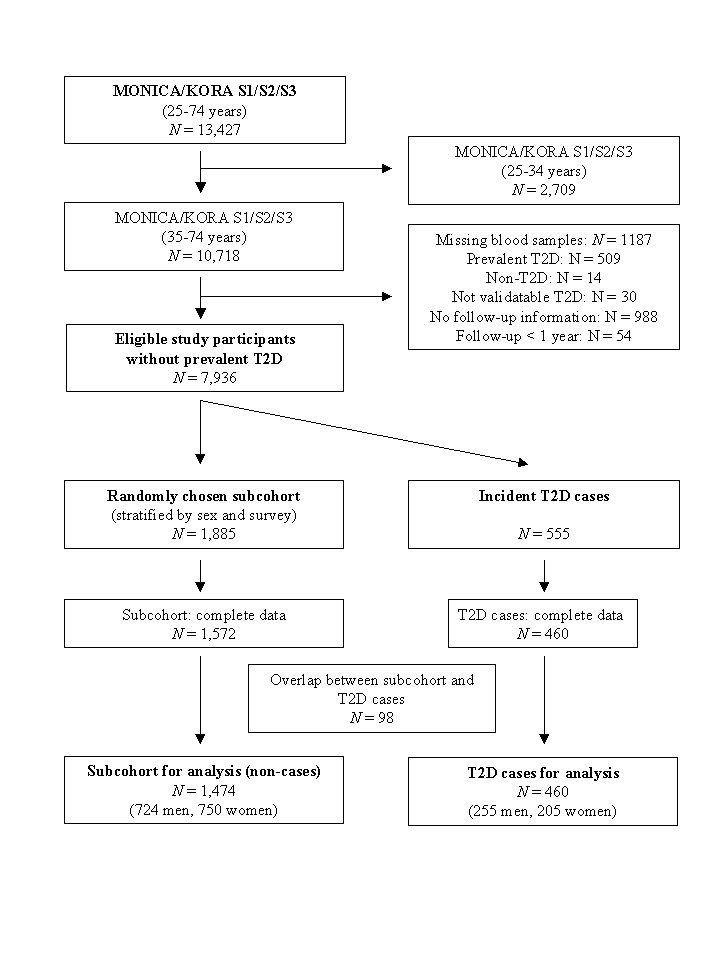

Supplement: dc09-0476_online_appendix.doc [file dc09-0476_online_appendix.doc]
